# Supplementary material for: Development of a Novel Nanoarchitecture of the Robust Photosystem I from a Volcanic Microalga Cyanidioschyzon merolae on Single Layer Graphene for Improved Photocurrent Generation
Source: MDPI journal article supplement (doi:10.3390/ijms22168396), 2021-08-05
Supplement: s1 [file s1]

## Supplementary Information

# Development of a novel nanoarchitecture of robust photosystem I from a volcanic microalga *Cyanidioschyzon merolae* on single layer graphene for enhanced photocurrent generation

Miriam Izzo<sup>1</sup>, Margot Jacquet<sup>1</sup>, Takayuki Fujiwara<sup>2</sup>, Ersan Harputlu<sup>3</sup>, Radosław Mazur<sup>4</sup>, Piotr Wróbel<sup>5</sup>, Tomasz Góral<sup>6</sup>, C. Gokhan Unlu<sup>7</sup>, Kasim Ocakoglu<sup>3</sup>, Shin-ya Miyagishima<sup>2</sup>, Joanna Kargul<sup>1\*</sup>

<sup>1</sup>Solar Fuels Laboratory, Center of New Technologies, University of Warsaw, Banacha 2C, 02-097 Warsaw, Poland.

<sup>2</sup>Department of Gene Function and Phenomics, National Institute of Genetics, Yata 111, Mishima, Shizuoka, 411-8540, Japan.

<sup>3</sup>Department of Engineering Fundamental Sciences, Faculty of Engineering, Tarsus University, 33400, Tarsus, Turkey

<sup>4</sup>Department of Metabolic Regulation, Institute of Biochemistry, Faculty of Biology, University of Warsaw, Miecznikowa 1, 02-096 Warsaw, Poland.

<sup>5</sup>Faculty of Physics, University of Warsaw, Pasteura 7, 02-093, Warsaw, Poland.

<sup>6</sup>Cryomicroscopy and Electron Diffraction Core Facility, Center of New Technologies, University of Warsaw, 02-097 Warsaw, Poland

<sup>7</sup>Department of Biomedical Engineering, Pamukkale University, TR-20070 Denizli, Turkey

\*corresponding author: [j.kargul@cent.uw.edu.pl](mailto:j.kargul@cent.uw.edu.pl) (J. K.)

## Table of contents

|                                                                                                |   |
|------------------------------------------------------------------------------------------------|---|
| <b>Photochemical activity of purified PSI samples</b> .....                                    | 2 |
| <b>Proteomic analysis of the native and His<sub>6</sub>-PsaD-PSI samples</b> .....             | 2 |
| <b>Additional confocal microscopy analysis</b> .....                                           | 5 |
| <b>Photocurrent measurements</b> .....                                                         | 6 |
| <b>List of primers used for DNA constructs</b> .....                                           | 6 |
| <b>Table S3. List of primers and a synthetic gene sequence used in the present study</b> ..... | 6 |
| <b>Single layer graphene preparation and characterization</b> .....                            | 7 |

## Photochemical activity of purified PSI samples

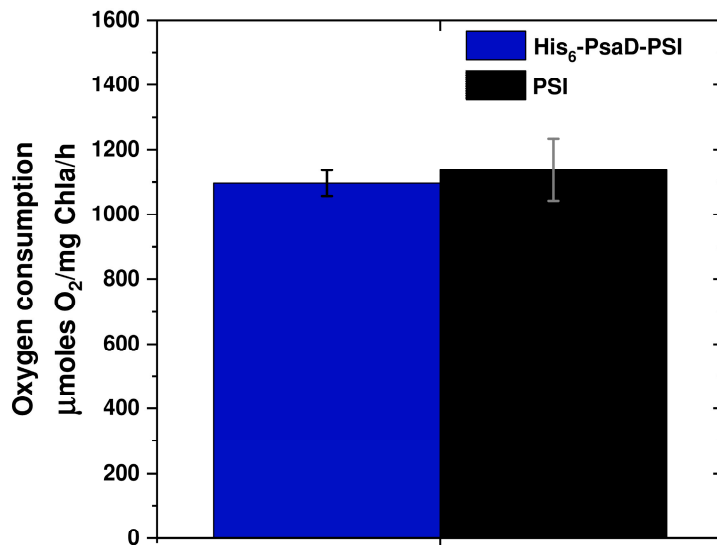

**Figure S1.** Photochemical activity of native and His<sub>6</sub>-tagged *C. merolae* PSI purified complexes. The values were obtained from three independent measurements and expressed as means ± SD.

## Proteomic analysis of the native and His<sub>6</sub>-PsaD-PSI samples

**Table S1.** LC-MS/MS analysis of the *C. merolae* His<sub>6</sub>-PsaD- PSI. Proteins identified in the His<sub>6</sub>-PsaD-PSI complex preparation.

| MS-MS search results <sup>a</sup> |                                                            |            |                |              |
|-----------------------------------|------------------------------------------------------------|------------|----------------|--------------|
| Accession <sup>b</sup>            | Protein name/description                                   | PLGS score | Peptides found | Coverage [%] |
| NP 848982.1                       | photosystem I subunit VII chloroplast                      | 89614.8    | 7              | 70.4         |
| NP 849051.1                       | photosystem I subunit II chloroplast                       | 56379.8    | 16             | 42.4         |
| NP 849104.1                       | photosystem I subunit III chloroplast                      | 43701.2    | 11             | 44.9         |
| XP 005537965.1                    | hypothetical protein CYME CMP346C                          | 37623.1    | 15             | 52.4         |
| NP 849064.1                       | allophycocyanin alpha subunit chloroplast                  | 35229.4    | 12             | 72.7         |
| NP 848987.1                       | phycocyanin beta chain chloroplast                         | 33581.0    | 11             | 67.4         |
| XP 005536140.1                    | mitochondrial F type ATPase F1 subunit beta precursor      | 26975.4    | 28             | 64.9         |
| XP 005538084.1                    | similar to light harvesting protein                        | 23590.0    | 19             | 45.3         |
| XP 005539408.1                    | mitochondrial F type ATPase F1 subunit alpha precursor     | 22582.5    | 29             | 43.4         |
| NP 848986.1                       | phycocyanin alpha chain chloroplast                        | 22266.3    | 18             | 66.0         |
| NP 849065.1                       | allophycocyanin beta subunit chloroplast                   | 20084.3    | 12             | 62.1         |
| XP 005537858.1                    | malate dehydrogenase mitochondrial precursor               | 19250.1    | 17             | 60.4         |
| NP 849039.1                       | photosystem I subunit IV chloroplast                       | 14593.4    | 7              | 56.4         |
| NP 849045.1                       | photosystem I P700 chlorophyll a apoprotein A2 chloroplast | 14385.7    | 31             | 21.2         |
| XP 005537362.1                    | similar to chlorophyll a/b binding protein CP24            | 13370.2    | 3              | 17.1         |
| XP 005535687.1                    | mitochondrial F1F0 ATP synthase subunit ATP5               | 10099.0    | 7              | 40.3         |
| XP 005537833.1                    | phycocyanin-associated rod linker protein                  | 9585.6     | 22             | 49.1         |
| XP 005538967.1                    | eukaryotic translation initiation factor eIF 5A            | 9547.0     | 14             | 58.8         |
| XP 005536581.1                    | mitochondrial F-type ATPase F0 subunit d                   | 8397.6     | 6              | 45.4         |

|                |                                                                                                           |        |    |      |
|----------------|-----------------------------------------------------------------------------------------------------------|--------|----|------|
| XP 005537275.1 | mitochondrial F-type ATPase F1 subunit delta precursor                                                    | 6832.0 | 6  | 58.9 |
| NP 849044.1    | photosystem I P700 chlorophyll a apoprotein A1 chloroplast                                                | 6594.8 | 27 | 21.3 |
| XP 005534978.1 | hypothetical protein CYME CMJ266C                                                                         | 5827.5 | 7  | 36.5 |
| XP 005537774.1 | probable dehydrogenase                                                                                    | 5277.2 | 23 | 47.0 |
| XP 005538503.1 | threonine 3-dehydrogenase                                                                                 | 4633.7 | 10 | 35.0 |
| NP 849135.1    | photosystem I subunit XI chloroplast                                                                      | 4245.9 | 7  | 48.6 |
| XP 005538061.1 | hypothetical protein CYME CMQ114C                                                                         | 3997.7 | 10 | 43.9 |
| XP 005539020.1 | NADH dependent hydroxypyruvate reductase                                                                  | 3984.2 | 17 | 64.3 |
| XP 005537353.1 | mitochondrial F-type ATPase F1 subunit epsilon precursor                                                  | 3601.6 | 2  | 37.3 |
| XP 005538998.1 | chloroplast 3-oxoacyl acyl carrier protein reductase precursor                                            | 3483.7 | 5  | 29.0 |
| XP 005536151.1 | heme oxygenase                                                                                            | 3402.3 | 7  | 28.3 |
| XP 005536698.1 | mitochondrial F-type ATPase F1 subunit gamma precursor                                                    | 2964.9 | 8  | 30.5 |
| XP 005538360.1 | hypothetical protein conserved                                                                            | 2906.2 | 18 | 37.3 |
| XP 005538276.1 | hypothetical protein CYME CMQ391C                                                                         | 2786.9 | 3  | 24.6 |
| XP 005536091.1 | succinyl CoA synthetase alpha chain                                                                       | 2542.2 | 7  | 25.8 |
| XP 005536727.1 | hypothetical protein CYME CML072C                                                                         | 2521.8 | 6  | 24.0 |
| XP 005539234.1 | succinate CoA ligase mitochondrial precursor                                                              | 2452.3 | 11 | 38.2 |
| XP 005538805.1 | hypothetical protein CYME CMS143C                                                                         | 2341.3 | 2  | 18.3 |
| XP 005535124.1 | tryptophan tRNA ligase chloroplast or mitochondrial                                                       | 2099.1 | 13 | 28.8 |
| XP 005539433.1 | similar to transmembrane calcium manganese transporter Ccc1p                                              | 1746.3 | 4  | 23.1 |
| XP 005536306.1 | single strand binding protein SSB                                                                         | 1320.6 | 8  | 40.3 |
| NP 848983.1    | glutamate synthase chloroplast                                                                            | 1305.7 | 25 | 21.9 |
| XP 005538794.1 | ATP dependent Clp protease ATP binding subunit ClpB                                                       | 1287.2 | 19 | 25.6 |
| XP 005538607.1 | fusion protein of glyoxysomal fatty acid oxidation tetrafunctional protein and acetyl CoA acyltransferase | 1241.3 | 20 | 24.5 |
| XP 005536163.1 | eukaryotic translation elongation factor 1 alpha                                                          | 1240.0 | 7  | 24.0 |
| XP 005537086.1 | probable DNA binding protein                                                                              | 1227.1 | 8  | 29.7 |
| XP 005536747.1 | cytochrome c oxidase subunit Vb                                                                           | 1158.1 | 3  | 23.0 |
| XP 005539325.1 | serine threonine kinase KIN82                                                                             | 1137.9 | 8  | 27.7 |
| XP 005536396.1 | hypothetical protein CYME CMI242C                                                                         | 1085.7 | 2  | 16.1 |
| NP 848974.1    | phycobilisome rod core linker protein chloroplast                                                         | 1064.7 | 8  | 34.6 |
| NP 849063.1    | phycobilisome linker protein chloroplast                                                                  | 861.9  | 15 | 25.1 |
| XP 005537897.1 | probable endothelin converting enzyme 1                                                                   | 844.5  | 11 | 20.1 |
| XP 005537911.1 | similar to cyclophilin B                                                                                  | 843.7  | 3  | 15.8 |
| XP 005536932.1 | 3-oxoacyl acyl carrier protein synthase II                                                                | 826.6  | 3  | 12.6 |
| XP 005535739.1 | glutamate decarboxylase                                                                                   | 776.5  | 5  | 14.8 |
| XP 005538340.1 | glucose-6-phosphate 1-dehydrogenase                                                                       | 763.8  | 7  | 13.7 |
| XP 005537654.1 | similar to nuclear receptor binding factor like protein                                                   | 717.3  | 6  | 30.6 |
| XP 005535431.1 | small GTP binding protein of Rab family                                                                   | 677.0  | 5  | 26.8 |
| XP 005534860.1 | hypothetical protein CYME CMJ121C                                                                         | 626.6  | 1  | 11.5 |
| XP 005536880.1 | eukaryotic polypeptide chain release factor 3                                                             | 614.6  | 4  | 11.1 |
| XP 005534831.1 | probable beta amylase                                                                                     | 603.8  | 5  | 14.6 |
| XP 005535849.1 | mitochondrial intermembrane space complex subunit Tim10                                                   | 569.4  | 1  | 23.9 |
| XP 005534792.1 | glyceraldehyde-3-phosphate dehydrogenase                                                                  | 521.0  | 8  | 34.7 |
| XP 005538480.1 | asparagine tRNA ligase chloroplast precursor                                                              | 516.4  | 8  | 21.4 |
| XP 005535297.1 | similar to Transmembrane protein Tmp21 precursor                                                          | 484.0  | 2  | 9.8  |

|                |                                                      |       |   |      |
|----------------|------------------------------------------------------|-------|---|------|
| XP 005536254.1 | similar to mitochondrial magnesium transporter Mrs2p | 478.5 | 4 | 14.8 |
| XP 005538846.1 | glutamate tRNA ligase chloroplast or mitochondrial   | 440.6 | 6 | 12.3 |
| XP 005535043.1 | citrate synthase                                     | 427.1 | 8 | 21.5 |
| XP 005538366.1 | ferredoxin NADP reductase                            | 418.4 | 4 | 18.1 |
| XP 005538506.1 | probable dehydrogenase                               | 391.2 | 4 | 16.7 |
| XP 005535272.1 | glutathione reductase                                | 387.4 | 4 | 12.9 |
| XP 005537386.1 | probable carotenoid cis trans isomerase CrtH         | 363.6 | 5 | 9.6  |
| XP 005535558.1 | photosystem II biogenesis protein Psb29              | 358.1 | 5 | 21.1 |
| XP 005539125.1 | hypothetical protein CYME CMT069C                    | 325.1 | 5 | 11.7 |
| XP 005535737.1 | probable mannosyl oligosaccharide glucosidase        | 314.9 | 9 | 16.4 |
| XP 005536533.1 | acyl CoA oxidase ACX3                                | 308.5 | 7 | 11.5 |
| XP 005536821.1 | serine protease                                      | 224.9 | 1 | 3.1  |

<sup>a</sup> protein list generated by PLGS software using *Cyanidioschyzon merolae* protein RefSeq dataset (downloaded on April 1, 2021)

<sup>b</sup> RefSeq accession number

**Table S2. LC-MS/MS analysis of the native *C. merolae* PSI sample.** Proteins identified in the native PSI complex preparation.

| MS-MS search results <sup>a</sup> |                                                            |            |                |              |
|-----------------------------------|------------------------------------------------------------|------------|----------------|--------------|
| Accession <sup>b</sup>            | Protein name/description                                   | PLGS score | Peptides found | Coverage [%] |
| NP 848982.1                       | photosystem I subunit VII chloroplast                      | 26482.0    | 12             | 71.6         |
| NP 848986.1                       | phycocyanin alpha chain chloroplast                        | 10568.1    | 19             | 66.0         |
| NP 849051.1                       | photosystem I subunit II chloroplast                       | 9588.0     | 19             | 36.0         |
| NP 849104.1                       | photosystem I subunit III chloroplast                      | 9094.6     | 11             | 44.9         |
| NP 849135.1                       | photosystem I subunit XI chloroplast                       | 7719.9     | 10             | 32.1         |
| XP 005538084.1                    | similar to light harvesting protein                        | 6539.9     | 15             | 34.1         |
| NP 849045.1                       | photosystem I P700 chlorophyll a apoprotein A2 chloroplast | 4336.3     | 34             | 21.3         |
| XP 005537833.1                    | phycocyanin associated rod linker protein                  | 4201.3     | 28             | 51.1         |
| NP 849044.1                       | photosystem I P700 chlorophyll a apoprotein A1 chloroplast | 2414.5     | 33             | 24.6         |
| XP 005537362.1                    | similar to chlorophyll a/b binding protein CP24            | 2064.2     | 3              | 17.1         |
| XP 005537522.1                    | outer mitochondrial membrane protein porin                 | 1546.6     | 7              | 29.8         |
| XP 005537773.1                    | hypothetical protein conserved                             | 631.1      | 1              | 6.5          |
| NP_848974.1                       | phycobilisome rod core linker protein chloroplast          | 425.3      | 5              | 25.6         |
| XP_005536165.1                    | probable sulfate permease                                  | 362.3      | 5              | 7.3          |

<sup>a</sup> protein list generated by PLGS software using *Cyanidioschyzon merolae* protein RefSeq dataset (downloaded on April 1, 2021)

<sup>b</sup> RefSeq accession number

**a****PsaD**

|     |            |                   |            |                   |                   |            |
|-----|------------|-------------------|------------|-------------------|-------------------|------------|
| 1   | MLNLKMPSPS | <b>FLGSTGGWLR</b> | CAETEEKYAM | TWSSDQQHIF        | EMPTGGAAVM        | NSGDNLLYLA |
| 51  | RKEQALALAT | <b>QLRTQFKIQD</b> | YKIYRIFPSG | <b>EVQYLHPKDG</b> | <b>VLPYQVNKGR</b> | EQVGRVKSTI |
| 111 | GKNVNPAQVK | FTSKATYDR         |            |                   |                   |            |

**b****His<sub>6</sub>-PsaD**

|     |            |                   |            |                   |                   |            |
|-----|------------|-------------------|------------|-------------------|-------------------|------------|
| -10 |            |                   |            |                   |                   | MRGSHHHHHH |
| 1   | MLNLKMPSPS | <b>FLGSTGGWLR</b> | CAETEEKYAM | TWSSDQQHIF        | EMPTGGAAVM        | NSGDNLLYLA |
| 51  | RKEQALALAT | <b>QLRTQFKIQD</b> | YKIYRIFPSG | <b>EVQYLHPKDG</b> | <b>VLPYQVNKGR</b> | EQVGRVKSTI |
| 111 | GKNVNPAQVK | FTSKATYDR         |            |                   |                   |            |

**Figure S2.** Amino acid sequence of the *C. merolae* PsaD and His<sub>6</sub>-PsaD proteins superimposed with experimentally (MS/MS) identified peptides from *C. merolae* PSI preparations. **a**, Coverage map obtained from the native PSI sample. **b**, Coverage map obtained from His<sub>6</sub>-PsaD-PSI sample. Peptides from trypsin cleavage are denoted in bold.

### Additional confocal microscopy analysis

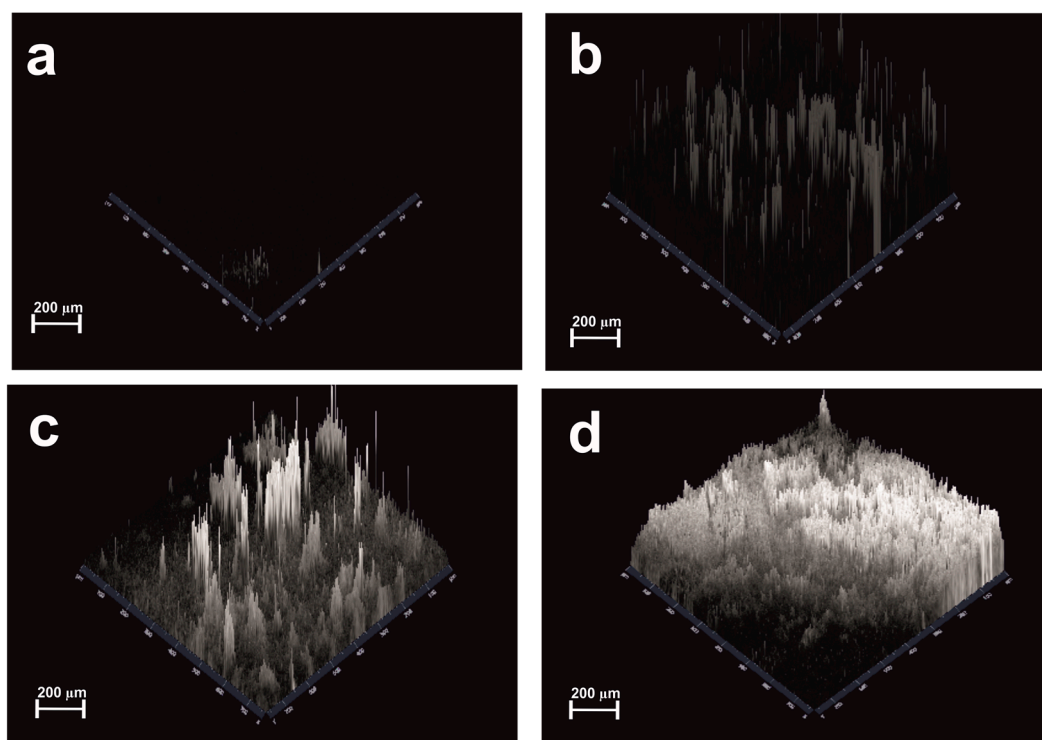

**Figure S3.** Confocal imaging of the PSI-biofunctionalized SLG/FTO electrodes, 2D fluorescence intensity maps. **a**, FTO/SLG/pyr-NTA-Ni device used as a negative control. **b**, FTO/SLG/pyr-NTA-Ni/PSI device. **c**, FTO/SLG/pyr-NTA-Ni/cyt *c*<sub>553</sub>/PSI device. **d**, FTO/SLG/pyr-NTA-Ni/His<sub>6</sub>-PsaD-PSI device. The visualized area

is  $\sim 0.41 \text{ mm}^2$ . Excitation is at 639 nm. Fluorescence distribution represented with a height map using an intensity range from 0 to 255, Scalebar is  $200 \text{ }\mu\text{m}$ .

## Photocurrent measurements

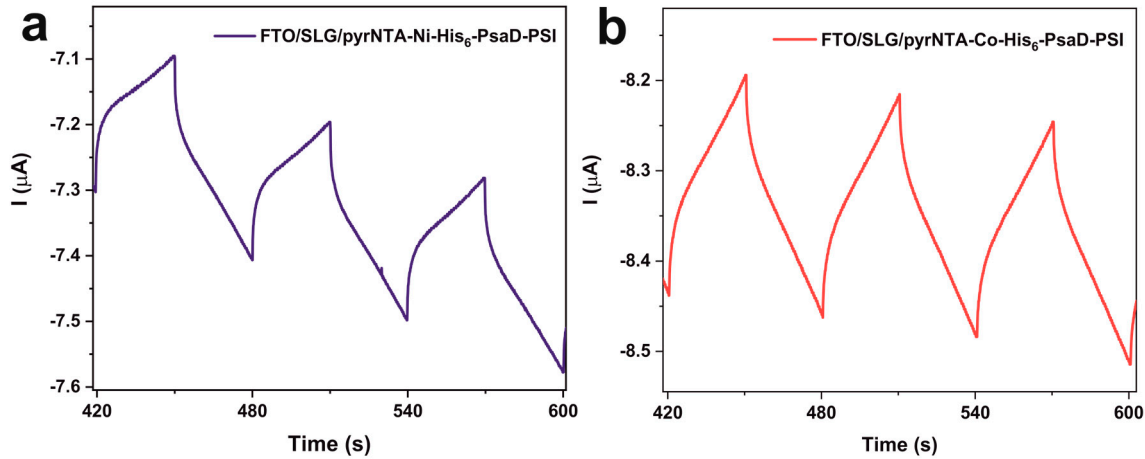

**Figure S4.** **a**, Photochronoamperometric curve obtained for FTO/SLG/pyr-NTA-Ni/His<sub>6</sub>-PsaD-PSI biohybrid device under 30 s. light/dark cycles. **b**, Photochronoamperometric curve obtained for FTO/SLG/pyr-NTA-Co/His<sub>6</sub>-PsaD-PSI biohybrid device under 30 s. light/dark cycles. Applied potential -0.3 V. Electrolyte: 5 mM phosphate buffer (pH 7.0). Light intensity:  $100 \text{ mW cm}^{-2}$  (1 sun).

## List of primers used for DNA constructs

**Table S3.** List of primers and a synthetic gene sequence used in the present study.

| No.                                                                    | Name                          | Nucleotide sequence                                                                                                                                                                                                                                                                                                                                            |
|------------------------------------------------------------------------|-------------------------------|----------------------------------------------------------------------------------------------------------------------------------------------------------------------------------------------------------------------------------------------------------------------------------------------------------------------------------------------------------------|
| 1                                                                      | URA(-2300)Fpgemt              | cgcgggaattcgatCTTCAAGAAAAGAGGATCTTTGCCGTGATGCC                                                                                                                                                                                                                                                                                                                 |
| 2                                                                      | URA(+471)Rpgemt               | gaattcactagtgtatCCCTAGCAGCTGACTGTATCTCTATTCTTAGGAAT                                                                                                                                                                                                                                                                                                            |
| 3                                                                      | URA(-898)R                    | AGTCATACAACAGTACTCAGATCGTTG                                                                                                                                                                                                                                                                                                                                    |
| 4                                                                      | URA(-897)F                    | GAACTGAGGGGCGAACGCA                                                                                                                                                                                                                                                                                                                                            |
| 5                                                                      | APCC(-600)Fura                | tactgttgatgactCGACGAGAACGTATAAGGAGTGC                                                                                                                                                                                                                                                                                                                          |
| 6                                                                      | APCC(180)Rhis                 | atgggagccacgcatATCATTCGCAACGCCAGATG                                                                                                                                                                                                                                                                                                                            |
| 7                                                                      | $\beta$ -tubulinTer(+1)FpsaD  | gccacgtacgaccggTAAACTAGCTATTTATCTGGTACATATCATTCAT                                                                                                                                                                                                                                                                                                              |
| 8                                                                      | $\beta$ -tubulinTer(+200)Rura | gaactgagggcgaaACACTTTTGCCTGCACAAG                                                                                                                                                                                                                                                                                                                              |
| 9                                                                      | pGEMTeasyF                    | CGTTGTAAAACGACGGCCAGT                                                                                                                                                                                                                                                                                                                                          |
| 10                                                                     | pGEMTeasyR                    | ACAATTTACACAGGAAACAGCTATGAC                                                                                                                                                                                                                                                                                                                                    |
| <i>The lowercase letters indicate sequences for In-Fusion reaction</i> |                               |                                                                                                                                                                                                                                                                                                                                                                |
| 9                                                                      | His <sub>6</sub> -PsaD        | ATGCGTGGCTCCCATCACCATCACCACCACATGCTGAATC<br>TGAAGATGCCCTCCCCAAGCTTCTTGGGTTCGACTGGCGG<br>TTGGTTGCGCTGCGCGAAACGGAAGAGAAATATGCGATG<br>ACGTGGTCGAGCGACCAGCAGCATATCTTCGAGATGCCGA<br>CGGGTGGGGCAGCCGTTATGAACTCAGGCGATAATCTCCTT<br>TATCTCGCTCGAAAGAGCAGGCGCTGGCTCTGGCAACACA<br>ACTCCGCACACAGTTTAAGATCCAGGATTACAAGATCTATC<br>GTATTTTTCATCGGGCGAAGTTCAATACCTCCACCCGAAGG |

## Single layer graphene preparation and characterization

The graphene layer was grown on the Cu foil, then transferred onto the fluorine-doped tin oxide (FTO) substrate as described below. Firstly, a polymethyl methacrylate (PMMA) solution coated onto the SLG/Cu surface by spin coating. Then, PMMA coated SLG/Cu substrate keep in the iron (III) nitrate solution for 1 day to etch Cu substrate. The PMMA/graphene layer was washed with deionized water and hydrochloric acid (HCl) solution to remove metal contaminants, then washed again in deionized water. The graphene-PMMA layer was transferred onto the FTO-coated glass surface. The PMMA/graphene/FTO substrate was left in 99.9% pure acetone at 40 °C for 30 min to remove the PMMA layer. The resultant SLG on the FTO surface was analyzed by Raman scattering spectroscopy using a WITec alpha300 Raman microscope to determine the number of graphene layers, the density of possible defects in the SLG structure, and the presence of undesirable impurities. Figure S1 presents a typical Raman spectrum of the SLG on the FTO substrate. The D, G, and 2D peaks were identified following excitation of SLG on FTO substrates at 488 nm and were determined at 1332.70, 1582.96 and 2658.70  $\text{cm}^{-1}$  (see Fig. S1). The ratio of the D band to the G band, which is commonly used to assess the quality of a graphene layer, was 0.11, which indicated that very low amount of defects in the  $\pi$ -system and the high quality of SLG transferred onto the FTO substrate. Moreover, a sharp and symmetrical 2D band in conjunction with the high 2D/G peak ratio of 1.71 (Fig. S1) confirms the formation of SLG in our system.

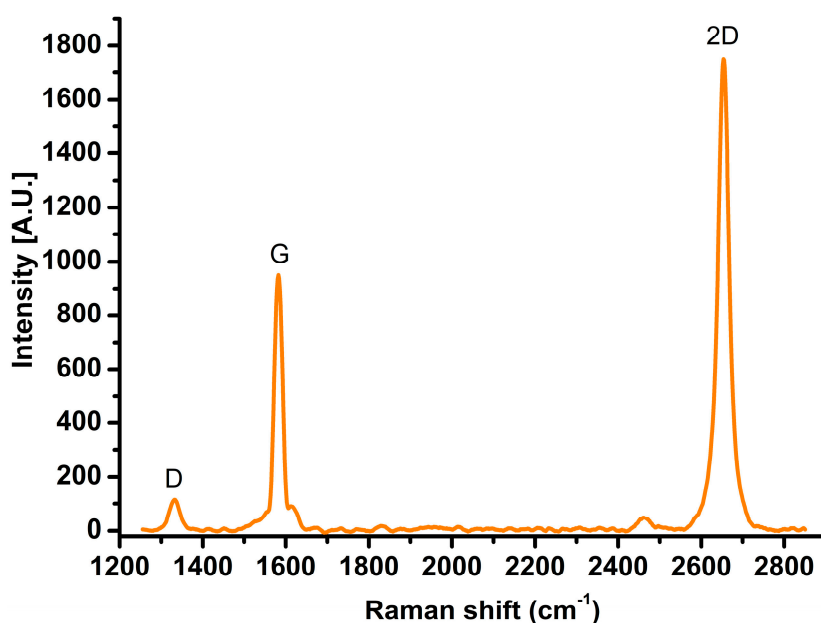

**Figure S5.** Average Raman spectrum of a high-quality defect-free SLG on FTO substrate. The D, G, and 2D bands represent the main Raman features of a high-quality graphene layer.

The Field emission-scanning electron microscopy (Zeiss/Supra 55 FE-SEM) images (Fig. S2) and light microscopy (Fig. S3) analyses confirmed that the SLG completely covers the surface of the FTO substrate. From the SEM images it can be concluded that the transparent graphene layer made the morphology of the FTO surface visible.

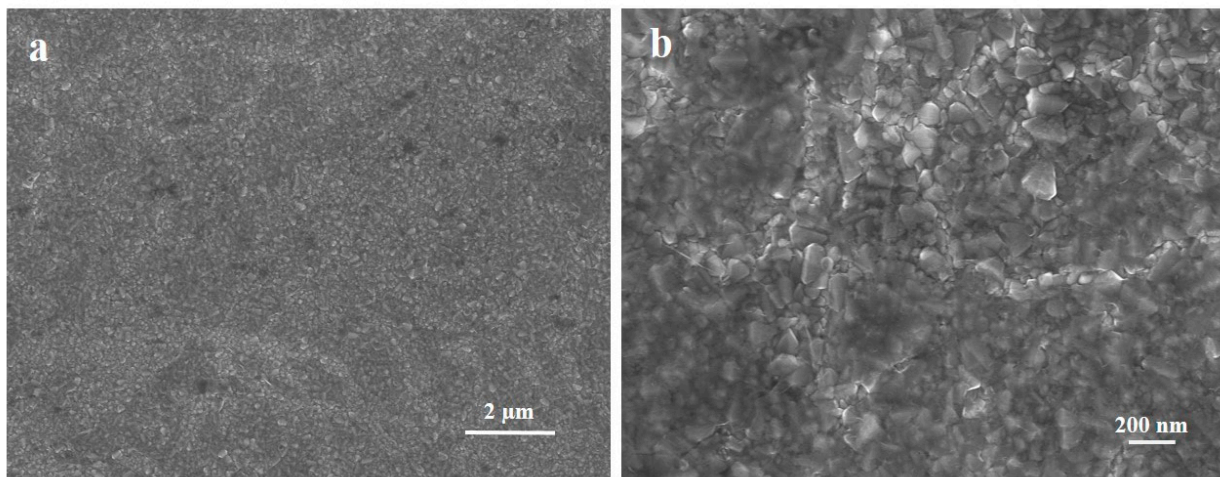

**Figure S6.** Top-view SEM images of FTO substrate covered with SLG. Panels (a) and (b) show FTO surface coated with SLG visualized at two different magnifications, as indicated.

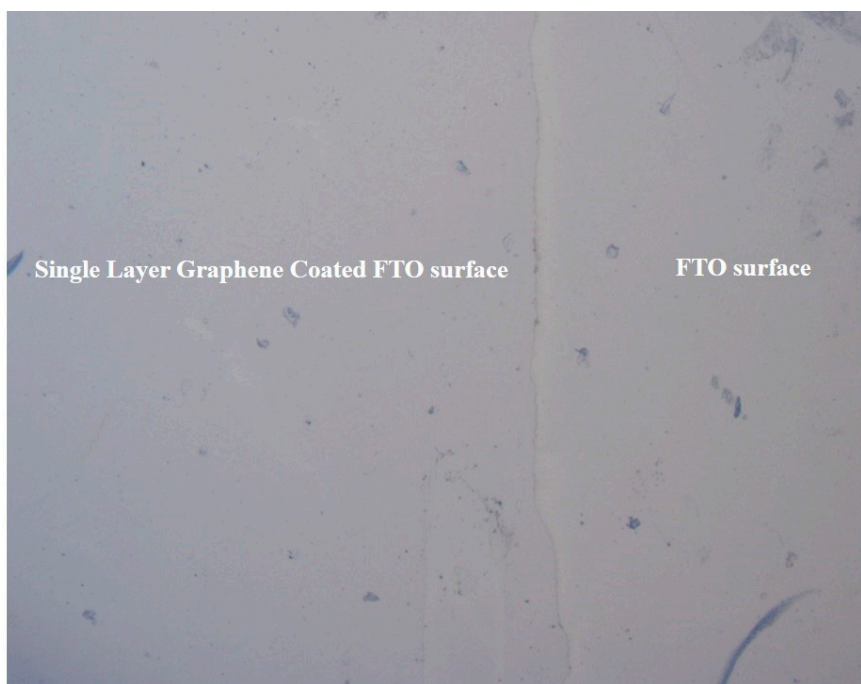

**Figure S7.** Polarized light microscopy imaging of the FTO/SLG sample. The polarized light micrograph shows areas fully covered with SLG and bare FTO.

Atomic Force Microscopy (AFM) measurements were carried out in a non-contact mode using a Park System XE-100 SPM instrument under ambient conditions. Furthermore, as seen in the AFM image of the SLG/FTO electrode (see Fig. S4), deposition of graphene substantially reduces the roughness of the electrode surface. The red scan line took from SLG/FTO surface and the average roughness was measured near 18 nm, on the other hand, the green scan line took from just the FTO surface and the average roughness was measured ca. 35 nm.

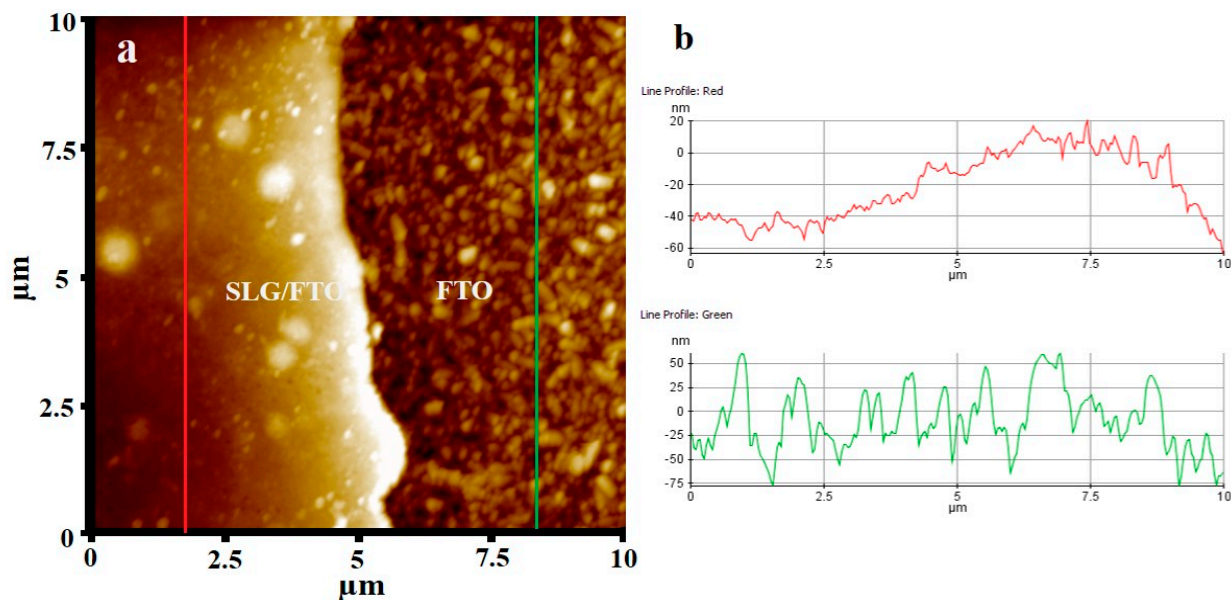

**Figure S8.** AFM visualization of SLG on FTO surface. Shown is a topographic image of SLG on FTO surface (a), as well as the AFM height profiles (b) of SLG/FTO surface (red line) and bare FTO surface (green line).
